# Supplementary material for: A three-in-one microfluidic droplet digital PCR platform for absolute quantitative analysis of DNA
Source: Royal Society of Chemistry journal article supplement (doi:10.1039/d3lc00107e), 2023-01-01
Supplement: d3lc00107e5.pdf [file d3lc00107e5.pdf]

## Supplementary Information

### **A three-in-one microfluidic droplet digital PCR platform for absolute quantitative analysis of DNA**

Yulin Ren<sup>a,b</sup>, Jingcheng Ji<sup>a,b</sup>, Haoqing Zhang<sup>a,b</sup>, Lei Cao<sup>a,b</sup>, Jie Hu<sup>c</sup>, Feng Xu<sup>a,b</sup>, Zedong Li<sup>a,b\*</sup>

<sup>a</sup> *The Key Laboratory of Biomedical Information Engineering of Ministry of Education, School of Life Science and Technology, Xi'an Jiaotong University, Xi'an, 710049, P.R. China*

<sup>b</sup> *Bioinspired Engineering and Biomechanics Center (BEBC), Xi'an Jiaotong University, Xi'an, 710049, P.R. China*

<sup>c</sup> *Suzhou DiYinAn Biotechnology Co., Ltd, Suzhou, 215010, P.R. China*

<sup>\*</sup> *Corresponding author: The Key Laboratory of Biomedical Information Engineering of Ministry of Education, Xi'an Jiaotong University, Xi'an, 710049, P.R. China.*

*E-mail addresses: zedong@xjtu.edu.cn*

## The theoretical value of dynamic detection range

Appropriately increasing the number of dPCR partition is beneficial to the quantitative accuracy and can expand the dynamic detection range.<sup>1, 2</sup> Our chip can collect 80,000-100,000 droplets with diameter of 57.8  $\mu\text{m}$ . The number of droplets is larger than the conventional commercial chip of 20,000 droplets, so the dynamic detection range can be increased. According to the quantitative characteristics of dPCR, the average copy number  $\lambda$  contained in the partition and the ratio  $q$  of the negative partition meet the following relationship:

$$\lambda = -\ln(b/n) = -\ln q$$

The upper detection limit and lower detection limit of digital PCR are  $\lambda_u$  and  $\lambda_l$  respectively, and the dynamic range  $R$  is used to characterize the range of deplorable detection concentrations. Then  $R$  can be expressed in the following logarithmic form:

$$R = \lg(\lambda_u/\lambda_l)$$

The theoretical dynamic detection range of our platform can reach 6log of magnitude, which is higher than the commercial platform of 5log.

## Application of three-in-one ddPCR platform for *Helicobacter pylori* 23S rRNA gene detection

*Helicobacter pylori* (*H. pylori*) is one of the most prevalent infectious bacteria, affecting about 50% of the world's population and is closely associated with peptic ulcers and gastric cancer.<sup>3</sup> The 23S rRNA gene is commonly used as a recognition gene for *H. pylori* detection. Therefore, to verify the applicability of our platform for pathogen detection, we tested *H. pylori* 23S rRNA gene using our three-in-one ddPCR platform. Specifically, the ddPCR reaction reagent (20  $\mu\text{L}$ ) for *H. pylori* 23S rRNA gene was prepared by mixing the following reagents: 10  $\mu\text{L}$  of ddPCR mix (BR186-3024, Biorad), 3.2  $\mu\text{L}$  total of a pair of primers (F1, R1, 10  $\mu\text{M}$ ), 1  $\mu\text{L}$  of probes (10  $\mu\text{M}$ ), 2  $\mu\text{L}$  of purified plasmid template and 3.8  $\mu\text{L}$  of double-distilled water (ddH<sub>2</sub>O). ddH<sub>2</sub>O was used as the template in negative controls. The primer, probe, and template sequences were listed in **Table S1**. The thermocycling protocol was as follows: 95  $^{\circ}\text{C}$

for 5 min, followed by 45 cycles of 95 °C for 15 s and 58 °C for 25 s. The detection results were displayed in **Fig. S8**, demonstrating that our three-in-one ddPCR platform can be used for pathogen detection.

## References

1. N. Majumdar, S. Banerjee, M. Pallas, T. Wessel and P. Hegerich, *Sci. Rep.*, 2017, **7**, 9617.
2. N. Majumdar, T. Wessel and J. Marks, *PloS one*, 2015, **10**, e0118833.
3. F. Khadangi, M. Yassi and M. A. Kerachian, *Helicobacter*, 2017, **22**.

## Supporting Figures and Tables

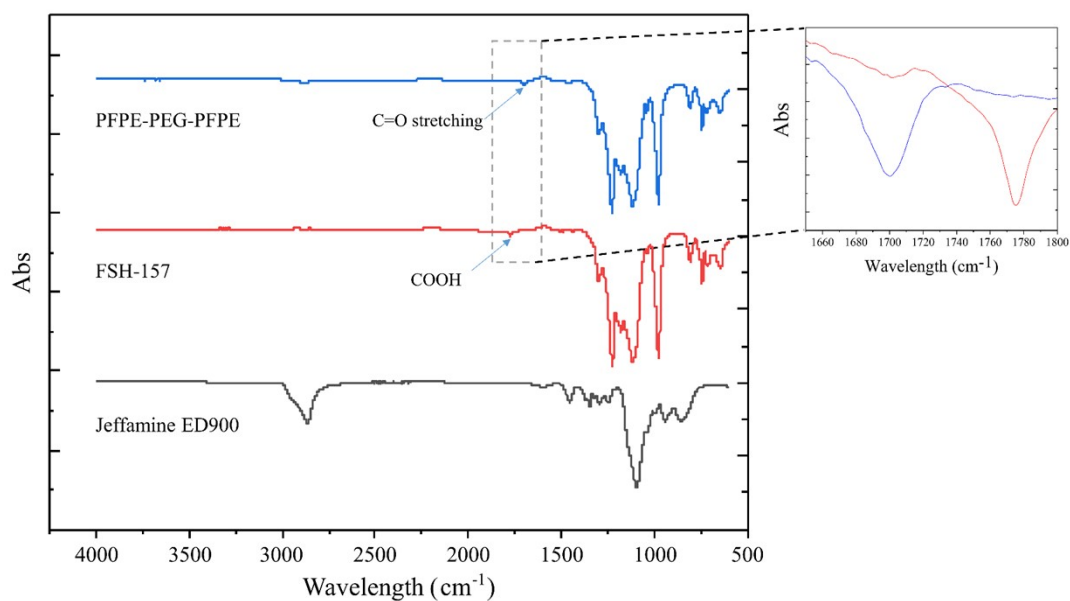

1

**Figure S1. FT-IR analysis of PFPE-PEG-PFPE surfactant.** In the IR spectrum of the surfactant, new peaks appear at 1700  $\text{cm}^{-1}$ , representing C=O stretching of the carbonyl group and amide II band. There is no indication of unreacted PFPE.

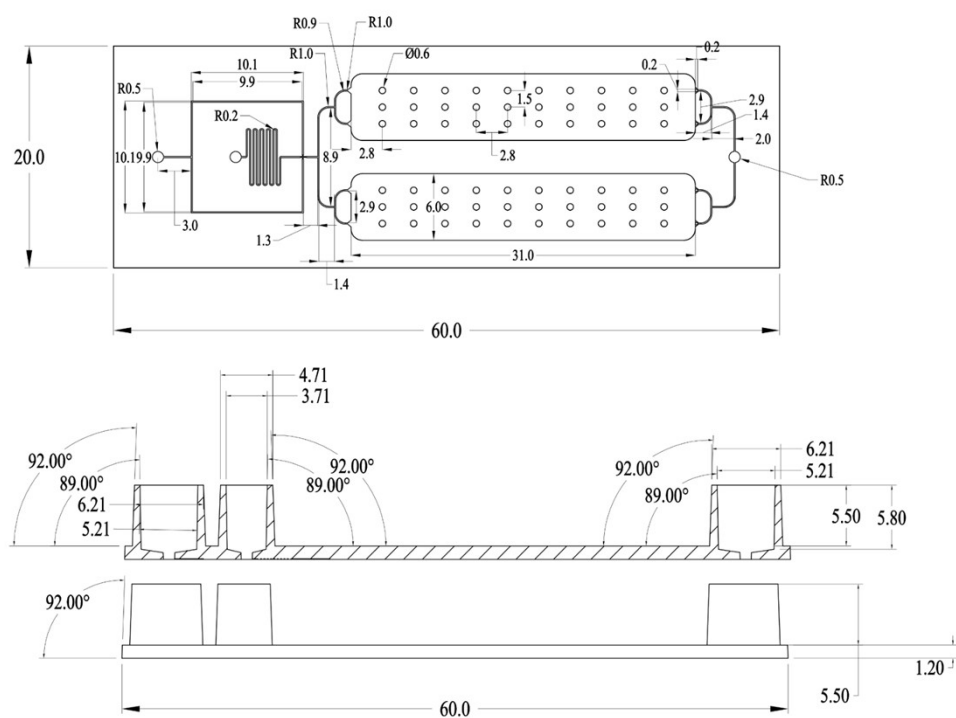

**Figure S2. Detailed size of chip.** Size unit is mm.

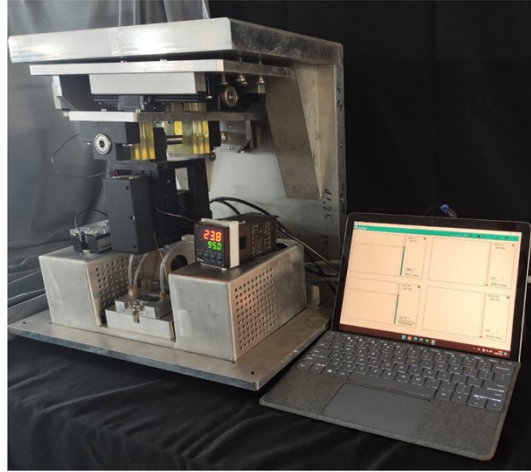

**Figure S3. Photograph of the three-in-one ddPCR platform.** The platform has dimensions of 40 cm in length, 40 cm in width, and 38.9 cm in height. The current instrument prototype has a weight of 33.25 kg.

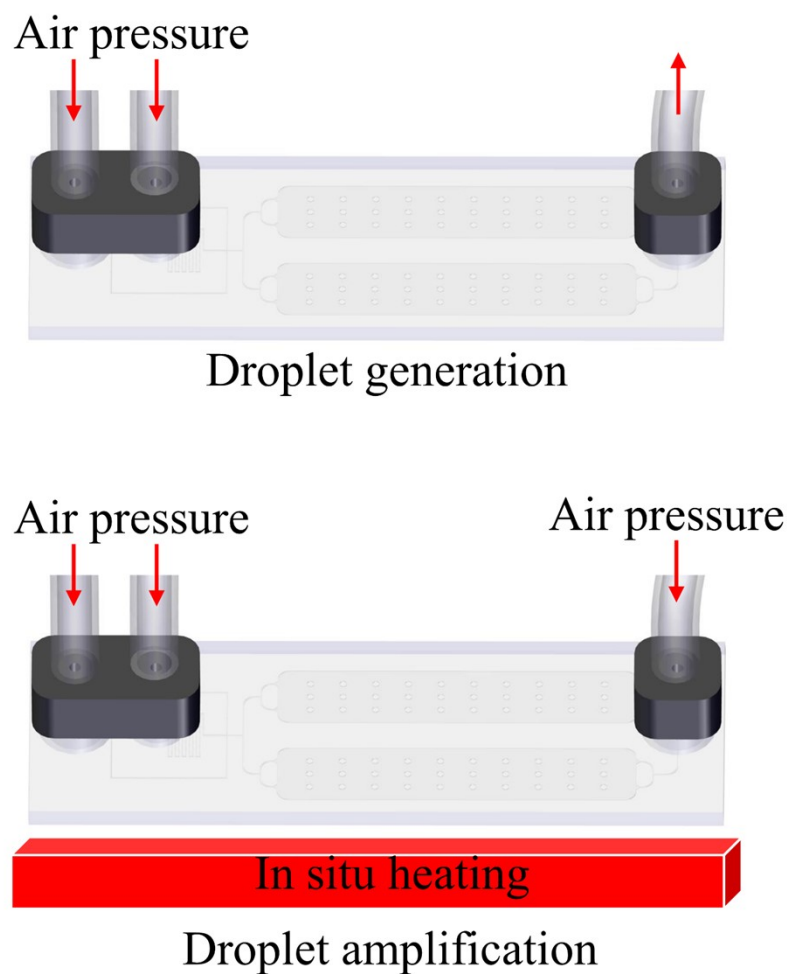

**Figure S4. The air pressure was added to the chip from droplet generation to in situ heating process.**

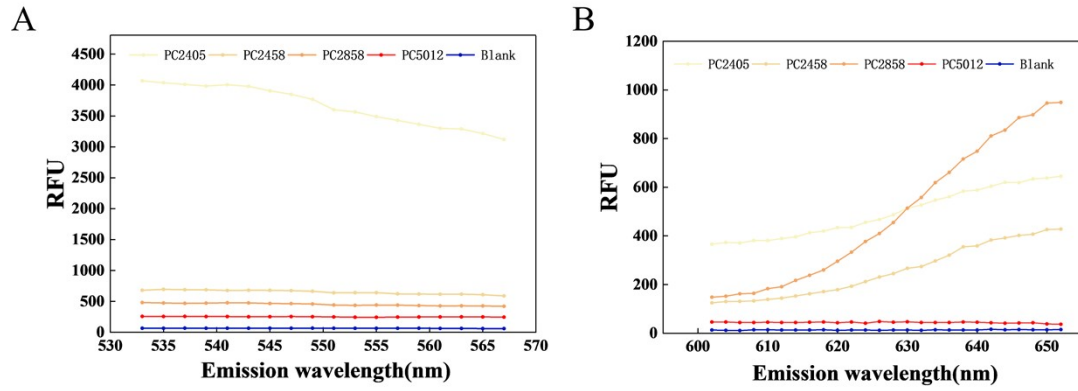

**Figure S5. Fluorescence emission spectra of different materials at 488 nm excitation light (A) and at 538 nm excitation light (B).**

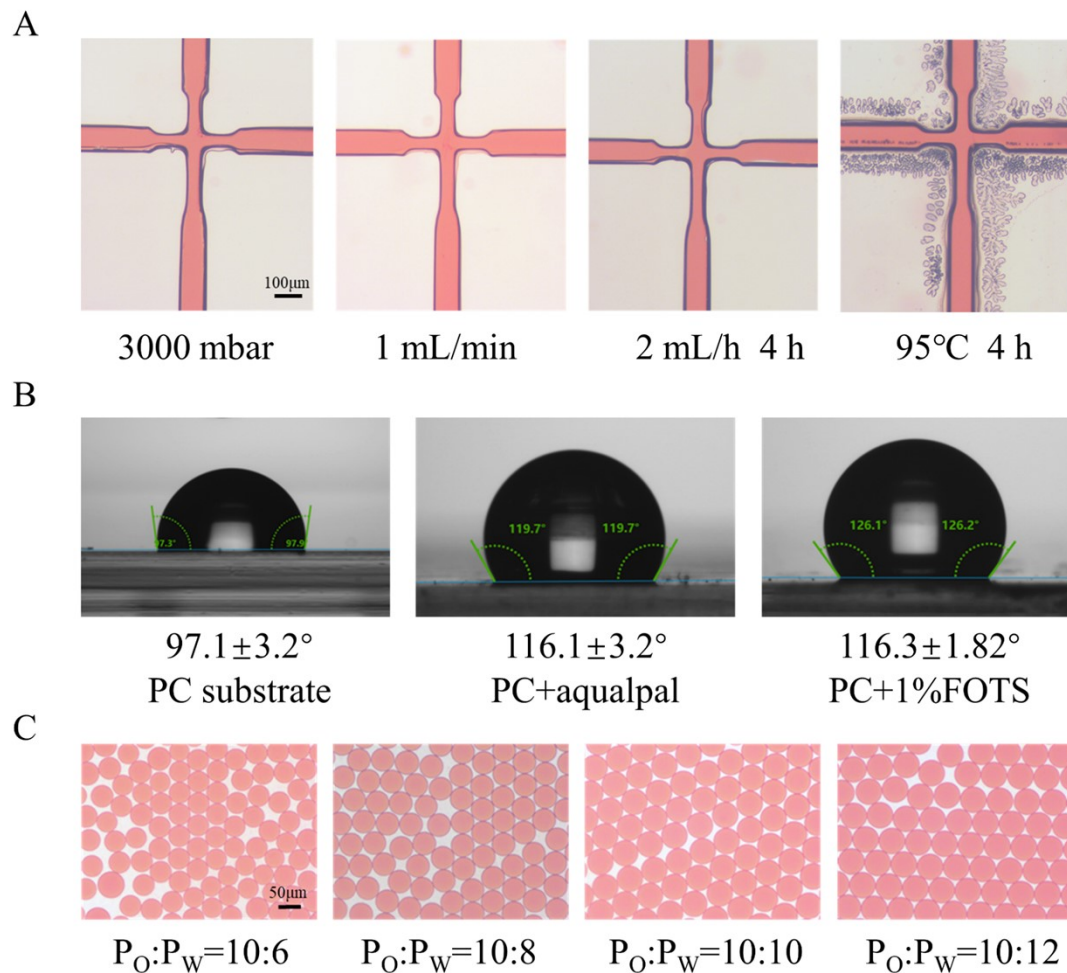

**Figure S6. Chip performance characterization.** (A) Flow channel bonding stability of chips under different conditions: 3000 mbar high pressure, 1 mL/min high flow rate, 2 mL/h continuous perfusion for 4 h, 95 °C for 4 h high temperature resistance. (B) Measurement of contact angle after hydrophobic treatment of chip surface with

aqualpal and with 1% FOTS. (C) Droplets with different sizes generated by different oil-water phase pressure ratios.

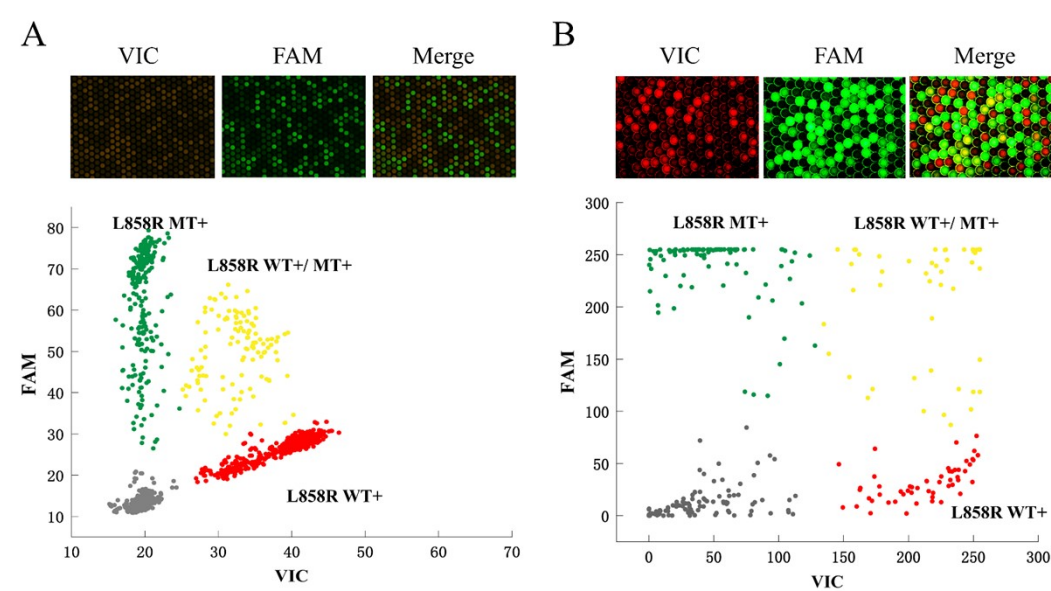

**Figure S7. Two channels detection results of mixed samples of L858R WT and MT.** (A) The detection results obtained from QuantStudio™ 3D dPCR system. (B) The detection results from our three-in-one ddPCR platform.

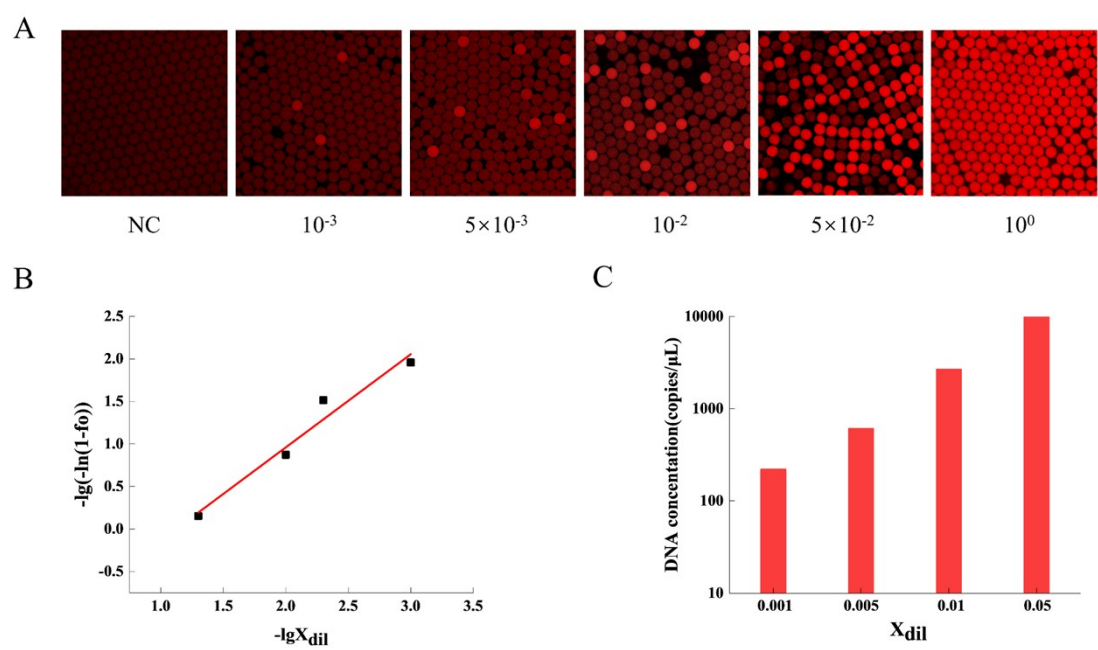

**Figure S8. Application of three-in-one ddPCR platform for *Helicobacter pylori* 23S rRNA gene detection.** (A) Fluorescent images were recorded with a serial



dilutions of 23S rRNA gene ranging from  $10^{-3}$  to  $10^0$  dilution. NC refers to negative control. (B) The linear fitting curve of 23S rRNA gene was obtained by plotting  $-\lg(-\ln(1-f_0))$  against  $-\lg X_{\text{dil}}$ . (C) The copy number results with a serial dilutions of 23S rRNA gene by three-in-one ddPCR platform.

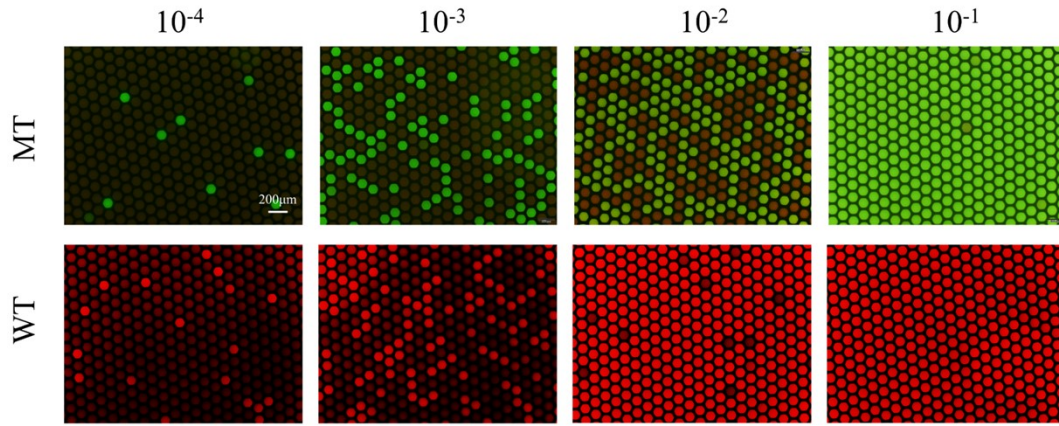

**Figure S9. dPCR fluorescent image with a serial dilution of the plasmid DNA template with L858R gene MT and WT ranging from  $10^{-4}$  to  $10^0$  dilution.** When the dilution concentration is  $10^{-1}$ , the QuantStudio™ 3D dPCR test results showed that all the microwells in the chip are positive, which is beyond the detection range. Our three-in-one ddPCR platform can still work at this concentration.



**Table S1. The sequence of primers, probes and templates for dPCR**

| Types    | Name            | Sequence (5' to 3')                                                                                                                                                                                                                                                                                                                                                                                                                       |
|----------|-----------------|-------------------------------------------------------------------------------------------------------------------------------------------------------------------------------------------------------------------------------------------------------------------------------------------------------------------------------------------------------------------------------------------------------------------------------------------|
| Primer   | EGFR L858R F    | GCAGCATGTCAAGATCACAGATT                                                                                                                                                                                                                                                                                                                                                                                                                   |
|          | EGFR L858R R    | CCTCCTTCTGCATGGTATTCTTTCT                                                                                                                                                                                                                                                                                                                                                                                                                 |
|          | 23S rRNA gene F | GTGAAAATTCCTCCTACCC                                                                                                                                                                                                                                                                                                                                                                                                                       |
|          | 23S rRNA gene R | AAGAGCCAAAGCCCTTAC                                                                                                                                                                                                                                                                                                                                                                                                                        |
| Probe    | L858R MP        | FAM-AGTTTGGCCCGCCCAA-MGB-NFQ                                                                                                                                                                                                                                                                                                                                                                                                              |
|          | L858R WP        | VIC-AGTTTGGCCAGCCCAA-MGB-NFQ                                                                                                                                                                                                                                                                                                                                                                                                              |
|          | 23S rRNA gene P | VIC-CCCACCTATCCTGCG-MGB                                                                                                                                                                                                                                                                                                                                                                                                                   |
| Template | L858R MT        | TCGCCAGCCATAAGTCCTCGACGTGGAGAGGCTCAGAGCCTGGCATGAACATGACCCTGAA<br>TTCGGATGCAGAGCTTCTTCCCATGATGATCTGTCCCTCACAGCAGGGTCTTCTCTGTTTCAG<br>GGCATGAACTACTTGGAGGACCGTCGCTTGGTGCACCGCGACCTGGCAGCCAGGAACGTAC<br>TGGTGAAAACACCGCAGCATGTCAAGATCACAGATTGTTGGCGGGCCAACTGCTGGGTGC<br>GGAAGAGAAAGAATACCATGCAGAAGGAGGCAAAGTAAGGAGGTGGCTTTAGGTCAGCCA<br>GCATTTTCCTGACACCAGGGACCAGGCTGCCTTCCCAGCTGTATTGTTTAACACATGCA<br>GGGGAGGATGCTCTCCAGACATTCTGGGTGAGCTCGC |
|          |                 |                                                                                                                                                                                                                                                                                                                                                                                                                                           |

L858R WT GCAGGGTCTTCTCTGTTTCAGGGCATGAACTACTTGGAGGACCGTCGCTTGGTGCACCGCGA  
CCTGGCAGCCAGGAACGTACTGGTGAAAACACC**GCAGCATGTCAAGATCACAGATT****TTGGG**  
**CTGGCCAAACT**GCTGGGTGCGGAAG**AGAAAGAATACCATGCAGAAGGAGGCAAAGTAAGG**  
AGGTGGCTTTAGGTCAGCCAGCATTTTCCTGACACCAGGGACCAGGCTGCCTTCCCCTAGC

23S rRNA gene GCGTCAGTCGCAAGATGAAGCGTTGAATTGAAGCCCGAGTAAACGGCGGCCGTAACCTATAA  
CGGTCCTAAGGTAGCGAAATTCCTTGTCGGTTAAATACCGACCTGCATGAATGGCGTAACGA  
GATGGGAGCTGTCTCAACCAGAGATTCAGTGAAATTGTAGTGGAG**GTGAAAATTCTCTCTAC**  
**CCGCGGCAAGACGGAAAGACCCCGTGGACCTTTACTACAACTTAGCACTGCTAATGGGAAT**  
**ATCATGCGCAGGATAGGTGGG**AGGCTTTGAAG**TAAGGGCTTTGGCTCTT**ATGGAGCCATCCT  
TGAGATACCACCCTTGATGTTTCTGTAGCTAACTGGCCTGTGTTATCCACAGGCAGGACAA  
TGCTTGGTGGGTAGTTTGACTGGGGCGGTCGCCTCCTAAAAAGTAACGGAGGCTTGCAAAG  
GTTGGCTCATTGCGGTTGGAAATCGCAAGTTG

---

**Table S2. Comparison of performance between three-in-one ddPCR and existing dPCR platforms**

| <b>dPCR Platform</b> | <b>Manufacturer</b> | <b>Integration</b> | <b>Detection time</b> | <b>Dynamic range</b> | <b>Cost</b>                       |
|----------------------|---------------------|--------------------|-----------------------|----------------------|-----------------------------------|
| QX100™/200™          | Biorad              | 3 instruments      | 3-5h                  | 5log                 | 500K-700K RMB + 80 RMB            |
| QuantStudio™3D       | Thermo Fisher       | 3 instruments      | 4h                    | 5log                 | 300K-400K RMB + 400 RMB           |
| Naica™ Crystal       | Stilla              | 2 instruments      | 2.5h                  | 5log                 | 500K-700K RMB + 286 RMB/4 samples |
| TD-1/TD-2            | TargetingOne        | 2 instruments      | 3h                    | 5log                 | 500K-1000K                        |
| QX One               | Biorad              | 1 instrument       | 2-3h                  | 5log                 | 2000K-5000K RMB + 80 RMB          |
| Three-in-one ddPCR   | This work           | 1 instrument       | 2h                    | 6log                 | 100K RMB + 13.3 RMB               |
